# Supplementary material
Source: PubMed Central journal article supplement (PMC4715743)

## SUPPLEMENTAL TABLES/FIGURES

**Table S1**

| NETs as % PMNs         | WT Unstim | Rac2 <sup>-/-</sup> Unstim | WT Ionomycin | Rac2 <sup>-/-</sup> Ionomycin | WT PMA    | Rac2 <sup>-/-</sup> PMA |
|------------------------|-----------|----------------------------|--------------|-------------------------------|-----------|-------------------------|
| Microscopy assay (n=4) | 2.8±0.8   | 0.7±0.4*                   | 19.6±2.3***  | 12.6±2.4**                    | 10.8±3.3* | 1.4±0.4 ns              |
| Flow assay (n=4)       | 3.0±0.3   | 0.6±0.2***                 | 41.9±4.7***  | 21.8±1.7***                   | 6.7±0.3** | 3.5±0.7 ns              |

**Table S1. Quantitative comparison of microscopy and flow-based assays for NETs determination.**

Quantification of the data displayed in Figure 1B and 1C. Neutrophils were isolated from peripheral blood of Rac2<sup>-/-</sup> mice or WT controls and stimulated with ionomycin (4 μM), PMA (100 nM) or the same volume of RPMI (Unstim) for 4 hours. Cells were then fixed and stained for NETs, by either microscopy-based assay (upper line); or by a flow-based assay (lower line) (N= 4, each). T-test: \*P<0.05, \*\*P<0.01, \*\*\*P<0.001, ns non-significant difference versus control (WT unstim).

## Figure S1. Gating controls

**A.** Mouse purified neutrophil were treated with ionomycin and stained as described. These sequential unidimensional plots illustrate that gating sequentially focuses on (i) 4',6-diamidino-2-phenylindole (DAPI) positive, (ii) H3Cit positive and (iii) MPO positive structures that define NETs. **B.** Represents the same sample (solid blue shade) overlaid with negative staining controls (black and white silhouette) in which primary antibody (respectively DAPI) was omitted.

# Figure S1

## A.

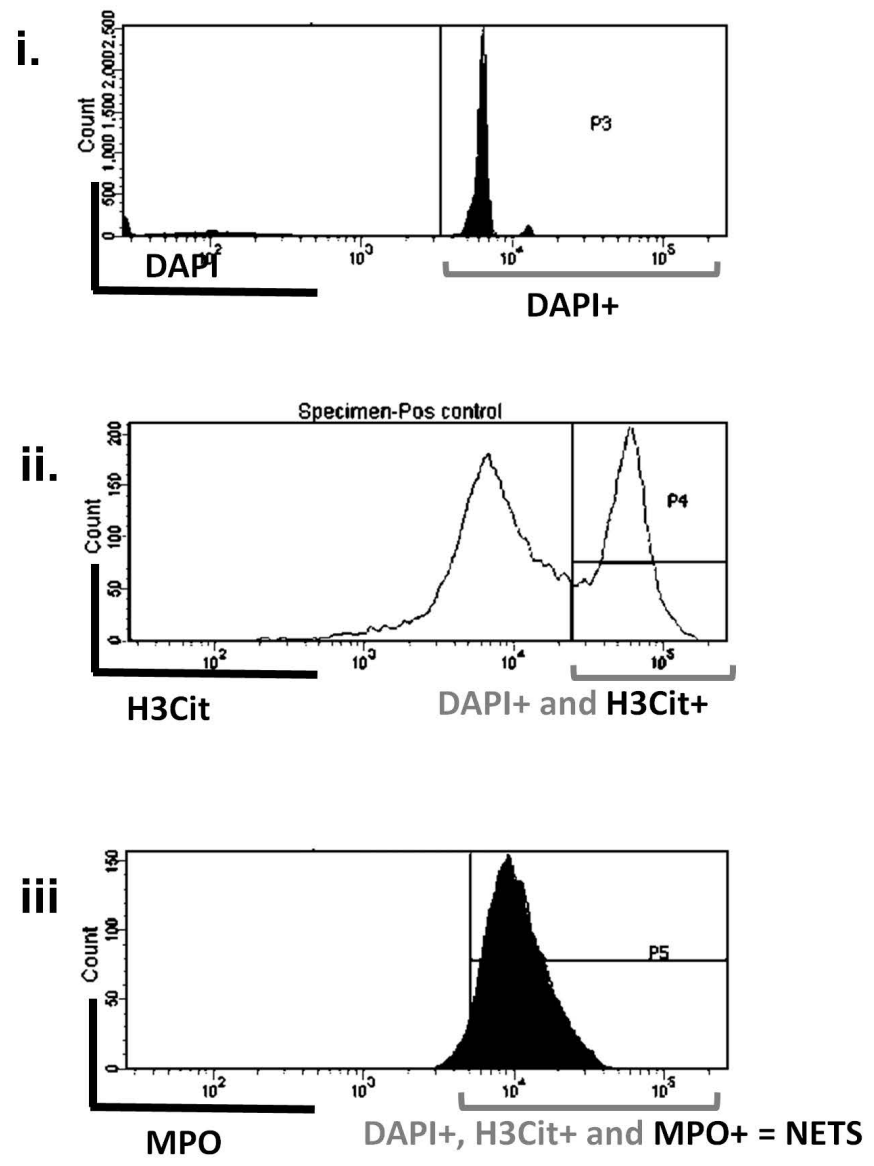

## B.

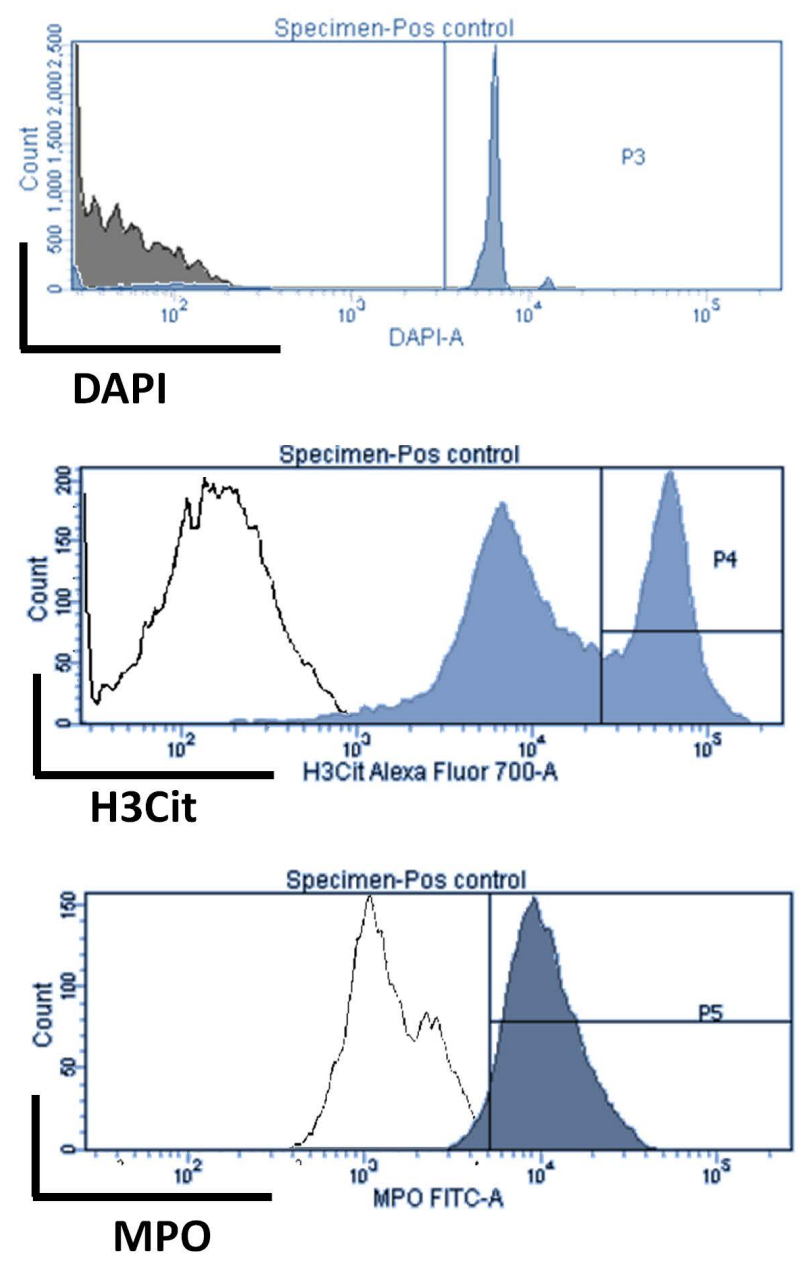

Supplement: NIHMS721673-supplement-Supp_TableS1___FigureS1.pdf [file NIHMS721673-supplement-Supp_TableS1___FigureS1.pdf]
